# Supplementary material
Source: PubMed Central journal article supplement (PMC8672803)
Supplement: ehp8584.smcontents.508.pdf [file ehp8584.smcontents.508.pdf]

**Note to readers with disabilities:** *EHP* strives to ensure that all journal content is accessible to all readers. However, some figures and Supplemental Material published in *EHP* articles may not conform to [508 standards](#) due to the complexity of the information being presented. If you need assistance accessing journal content, please contact [ehp508@niehs.nih.gov](mailto:ehp508@niehs.nih.gov). Our staff will work with you to assess and meet your accessibility needs within 3 working days.

### **Supplemental Material**

#### **Disparities in Air Pollution Exposure in the United States by Race/Ethnicity and Income, 1990–2010**

Jiawen Liu, Lara P. Clark, Matthew J. Bechle, Anjum Hajat, Sun-Young Kim, Allen L. Robinson, Lianne Sheppard, Adam A. Szpiro, and Julian D. Marshall

#### **Table of Contents**

##### **Figures and Tables Summary**

**Figure S1. Population weighted exposure distribution in year-2010 for seven demographic attributes: race-ethnicity, household income, income poverty ratio, age, language, mobility, and travel time to work.** For each boxplot, the lowest bound is the 10<sup>th</sup> percentile value; the box ranges from 25<sup>th</sup> to 75<sup>th</sup> percentile and the middle line in the box is the median value; the highest bound is the 90<sup>th</sup> percentile value. The red point in each boxplot is the population-weighted average for the group. Race-ethnicity includes four groups: non-Hispanic white, non-Hispanic black, Hispanic, and non-Hispanic Asian. Household annual income had 16 categories (in U.S. dollars: <10k, 10k-15k, 15k-20k, 20k-25k, 25k-30k, 30k-35k, 35k-40k, 40k-45k, 45k-50k, 50k-60k, 60k-75k, 75k-100k, 100k-125k, 125k-150k, 150k-200k, >200k). Ratio of income to poverty level were analyzed at five ranges: smaller than 0.5; 0.5-1; 1-1.5; 1.5-2; larger than 2. Age has 4 categories: younger than 5 years old; 5-17 years old; 18-65 years old; older than 65. Language data are by household language for 14-year and over. Total of 9 different household languages were analyzed: English only; Spanish and no 14+ speaks English only or “very well”; Spanish and at least one 14+ speaks English only or “very well”; Other Indo-European language and no 14+ speaks English only or “very well”; Other Indo-European language and at least one 14+ speaks English only or “very well”. Asian and Pacific Island language and no 14+ speaks English only or “very well”; Asian and Pacific Island language and at least one 14+ speaks English only or “very well”. Other language and no 14+ speaks English only or “very well”; Other language and at least one 14+ speaks English only or “very well”. Mobility contained the geographical mobility in the past year for people who currently reside in a Metropolitan Statistical Areas (MSA) data of six different status: same house as 1 year ago; different house but the same MSA; different house and different MSA; different house and moved from micropolitan statistical areas; different house and not moved from MSA or micropolitan statistical areas; abroad 1 year ago. Travel time covers workers 16 year and over in 7 levels: less than 10 minutes; 10-20 minutes; 20-30 minutes; 30-40 minutes; 40-60 minutes; 60-90 minutes; more than 90 minutes; people who work at home are excluded.

**Figure S2.** Percentage of population living in block groups with concentration above median, above 75<sup>th</sup> percentile, above 90<sup>th</sup> percentile and above 95<sup>th</sup> percentile for different racial-ethnic groups for six pollutants in year 2010. Percentage for each racial-ethnic group was calculated by population sum of the racial-ethnic group in all block groups meet the criterion divided by total population in U.S.

**Figure S3.** Demographic composition for block groups with concentration below median, above median, above 75<sup>th</sup> percentile, above 90<sup>th</sup> percentile and above 95<sup>th</sup> percentile for six pollutants in year 2010. Percentage for each racial-ethnic group was calculated by population sum of the group divided by total population in all block group meet the criterion, for example, above 95<sup>th</sup> percentile.

**Figure S4.** Percentage of population living in block groups with concentration above 95<sup>th</sup> percentile for 0, 1, 2, 3, 4+ out of six studied pollutants for different racial-ethnic groups in year 2010. Percentage for each racial-ethnic group was calculated by population sum of the racial-ethnic group in all block groups meet the criterion divided by total population in U.S.

**Figure S5.** Population weighted air pollution concentration in year 2010 by household income group. X-axis values are household income (units: \$1000). The black dash line is the Normalized concentration = 1, which is a base line for comparison (indicating that the concentration is the same for all income categories). Exposures are normalized to the average exposure of lowest income group (income < \$10k) to allow comparisons across all pollutants. Downward sloping lines indicate higher income groups experience lower exposure.

**Figure S6.** State-level exposure for 1990 and 2010 and absolute/relative disparity between racial-ethnic minorities and non-Hispanic White in 2010. Population-weighted average exposure for all six studied pollutants are calculated for year 1990 and 2010.

**Figure S7.** Estimated annual average criteria air pollution concentrations for the four largest race-ethnicity groups (non-Hispanic whites, non-Hispanic blacks, Hispanics of any race(s), and non-Hispanic Asians) for urban and rural populations in years 1990, 2000, and 2010. Horizontal lines indicate the estimated population-weighted mean concentration for each year for the total population (all race-ethnicity groups) and circles indicate the population-weighted mean concentration for each year for each of the four largest race-ethnicity groups.

**Table S1.** CACES empirical regression models performance for six criteria pollutants from 1990 to 2010.

**Table S2.** Population-weighted exposure distribution for six criteria pollutants for four main racial-ethnic groups from 1990 to 2010.

**Table S3.** Population-weighted average exposure for six criteria pollutants for total population and four main racial-ethnic groups in 2010 based on empirical model prediction.

**Table S4.** Difference between exposure for the most-exposed racial-ethnic group versus the least-exposed racial-ethnic group for criteria pollutants in 2010 based on empirical model prediction.

**Table S5.** Difference between exposure for the most-exposed demographic group versus the least-exposed demographic group for criteria pollutants in 2010.

**Table S6.** Weighted Gini coefficients by racial-ethnic group and pollutant, 1990 - 2010.

**Table S7.** Between-group Atkinson Index (AI) by racial-ethnic group and pollutant, 1990 - 2010.

**Table S8.** Population-weighted average exposure for six criteria pollutants for total population and four main racial-ethnic groups in 2010 based on U.S. EPA monitoring data.

**Table S9.** Difference between exposure for the most-exposed racial-ethnic group versus the least-exposed racial-ethnic groups for criteria pollutants in 2010 based on U.S. EPA monitoring data.

**Table S10.** Population-weighted mean error (ME) for total population and racial-ethnic groups by pollutants and by year.

**Table S11.** Disparity between the most- and least-exposed racial-ethnic groups and difference between population-weighted average error for the most- and least-exposed racial-ethnic groups by pollutants and by year.

**Table S12.** 10% block group bins with highest and lowest racial-ethnic minority residents' exposure for six studied pollutants in year 2010.

**Table S13.** The proportion of the population living in Block Groups with high-end exposures (i.e., above the 90<sup>th</sup> and 95<sup>th</sup> percentiles) for the four racial-ethnic groups in year 2010.

**Table S14.** The distribution of the population living in Block Groups with high-end exposures (i.e., above the 90<sup>th</sup> and 95<sup>th</sup> percentiles) for the four racial-ethnic groups.

**Table S15.** Risk of living in block groups above the 90<sup>th</sup> percentile for multiple pollutants for the four racial-ethnic groups in year 2010.

**Table S16.** Exposure disparity by household income: most- and least exposed-income categories exposures in 2010.

**Table S17.** Exposure disparity by household income: highest- and lowest-income categories exposures in 2010.

**Table S18.** Exposure disparity by 25<sup>th</sup>, 50<sup>th</sup> and 75<sup>th</sup> percentile of household income in 2010 and average change.

**Table S19.** The absolute exposure disparity between the most- and least-exposed racial-ethnic groups and the absolute exposure disparity between the most- and least-exposed income categories in 2010.

**Table S20.** National mean exposure for the four racial-ethnic groups in 2010.

**Table S21.** Population distribution of four studied racial-ethnic groups in 16 household income categories in 2010.

**Table S22.** Average racial-ethnic disparities in the same household categories and average household income disparities in the same racial-ethnic group in 2010.

**Table S23.** Urban/rural exposures in 2010.

**Table S24.** Difference between exposure for the most exposed racial-ethnic group versus the most exposed racial-ethnic groups for criteria pollutants for urban block groups and rural block groups in 2010.

**Table S25.** Exposure disparity by household income: highest- and lowest-income categories exposures in 2010 for urban and rural block groups.

**Table S26.** Population-weighted average exposure for six criteria pollutants for total population and four main racial-ethnic groups from 1990 to 2010.

**Table S27.** National annual population-weighted average change for six studied pollutants from 1990 to 2010 (2000 to 2010 for  $PM_{2.5}$ ).

**Table S28.** Temporal change of disparity on absolute and relative basis from 1990 to 2010 (2000 to 2010 for  $PM_{2.5}$ ).

**Table S29.** Temporal change for absolute disparity between lowest and highest deciles block group bins from 1990 to 2010 (2000 to 2010 for  $PM_{2.5}$ ).

**Table S30.** Change (from 1990 to 2010) in absolute racial-ethnic exposure disparity for 48 states plus District of Columbia (2000 to 2010 for  $PM_{2.5}$ ).

**Table S31.** Temporal change of exposure for urban and rural block groups from 1990 to 2010 (2000 to 2010 for  $PM_{2.5}$ ).

**Table S32.** Population-weighted exposure for counterfactual scenarios of migration.

**Table S33.** Contribution of air pollution concentration change over time for actual absolute racial-ethnic disparity by using counterfactual scenarios of migration.

## References

**Additional File-** Excel Document
